# Supplementary material for: Using ionic liquids to reduce energy consumption for carbon fibre production
Source: Royal Society of Chemistry journal article supplement (doi:10.1039/c6ta06842a), 2016-01-01

## Electronic Supplementary information (ESI)

### Supplementary information related to Figure 1.

The energy consumption of our 100 tons per year pilot line displayed on Figure 1 was measured by the Carbon Nexus production facility. The carbon fibre production line was loaded with 30 spools of 24000 filaments polyacrylonitrile precursors. The line speed was set up at 120 m/h. The carbon fibre produced from this trial had a tensile strength of 5.16 Gpa, a tensile modulus of 275.39 Gpa and an elongation of 2 %. The density of the stabilized and the carbon fibre was 1,365 g/cm<sup>3</sup> and 1,790 g/cm<sup>3</sup> respectively. The energy consumption per stage of the manufacturing process is shown on Table 1.

Table 1. Energy consumption of our carbon fibre line.

| Stage of the carbon fibre process   | Energy consumption (Kw) |
|-------------------------------------|-------------------------|
| Stabilisation                       | 134                     |
| Low temperature carbonisation       | 15                      |
| High temperature carbonisation      | 45                      |
| Abatement system                    | 25                      |
| Material handling                   | 5                       |
| Surface treatment, handling, drying | 43                      |
| Winding                             | 10                      |
| Total                               | 277                     |

## Supplementary information related to the paragraph ‘stabilisation of fibres’.

Table 2. Process parameters used for the manufacture of Control, Impregnated and Standard fibres.

| Products                          | Process parameters                         |                     |                               |                   |
|-----------------------------------|--------------------------------------------|---------------------|-------------------------------|-------------------|
| Control and<br>Impregnated fibres | Zone                                       | Temperature<br>(°C) | Residence time per zone (min) |                   |
|                                   | 1                                          | 180                 | 24                            |                   |
|                                   | 2                                          | 200                 |                               |                   |
|                                   | 3                                          | 220                 |                               |                   |
|                                   | 4                                          | 238                 |                               |                   |
|                                   | Material handling (drive system)           |                     |                               |                   |
|                                   | Drive number                               | 1                   | 2                             | 3                 |
|                                   | Draw (%)                                   | -                   | -10.8                         | 0                 |
|                                   | Speed (m/h)                                | 30                  | 26.8                          | 25.8              |
|                                   | Tension (cN)<br>(Untreated -<br>/Treated ) | 400/400<br>(±100)   | 1000/1000<br>(±100)           | 500/500<br>(±100) |
| Standard fibres                   | Zone                                       | Temperature<br>(°C) | Residence time per zone (min) |                   |
|                                   | 1                                          | 225                 | 24                            |                   |
|                                   | 2                                          | 235                 |                               |                   |
|                                   | 3                                          | 245                 |                               |                   |
|                                   | 4                                          | 255                 |                               |                   |
|                                   | Material handling (drive system)           |                     |                               |                   |
|                                   | Drive number                               | 1                   | 2                             | 3                 |
|                                   | Draw (%)                                   | -                   | 3.0                           | 4.0               |
|                                   | Speed (m/h)                                | 30                  | 30.9                          | 32.1              |
|                                   | Tension (cN)                               | 730 (±100)          | 1650 (±100)                   | 1570 (±100)       |

## Supplementary information related to the paragraph ‘Fibre stabilisation – infrared study’

Figure 1. FT-IR spectra of (A) Control, (B) Impregnated, (c) Standard fibres along the stabilisation

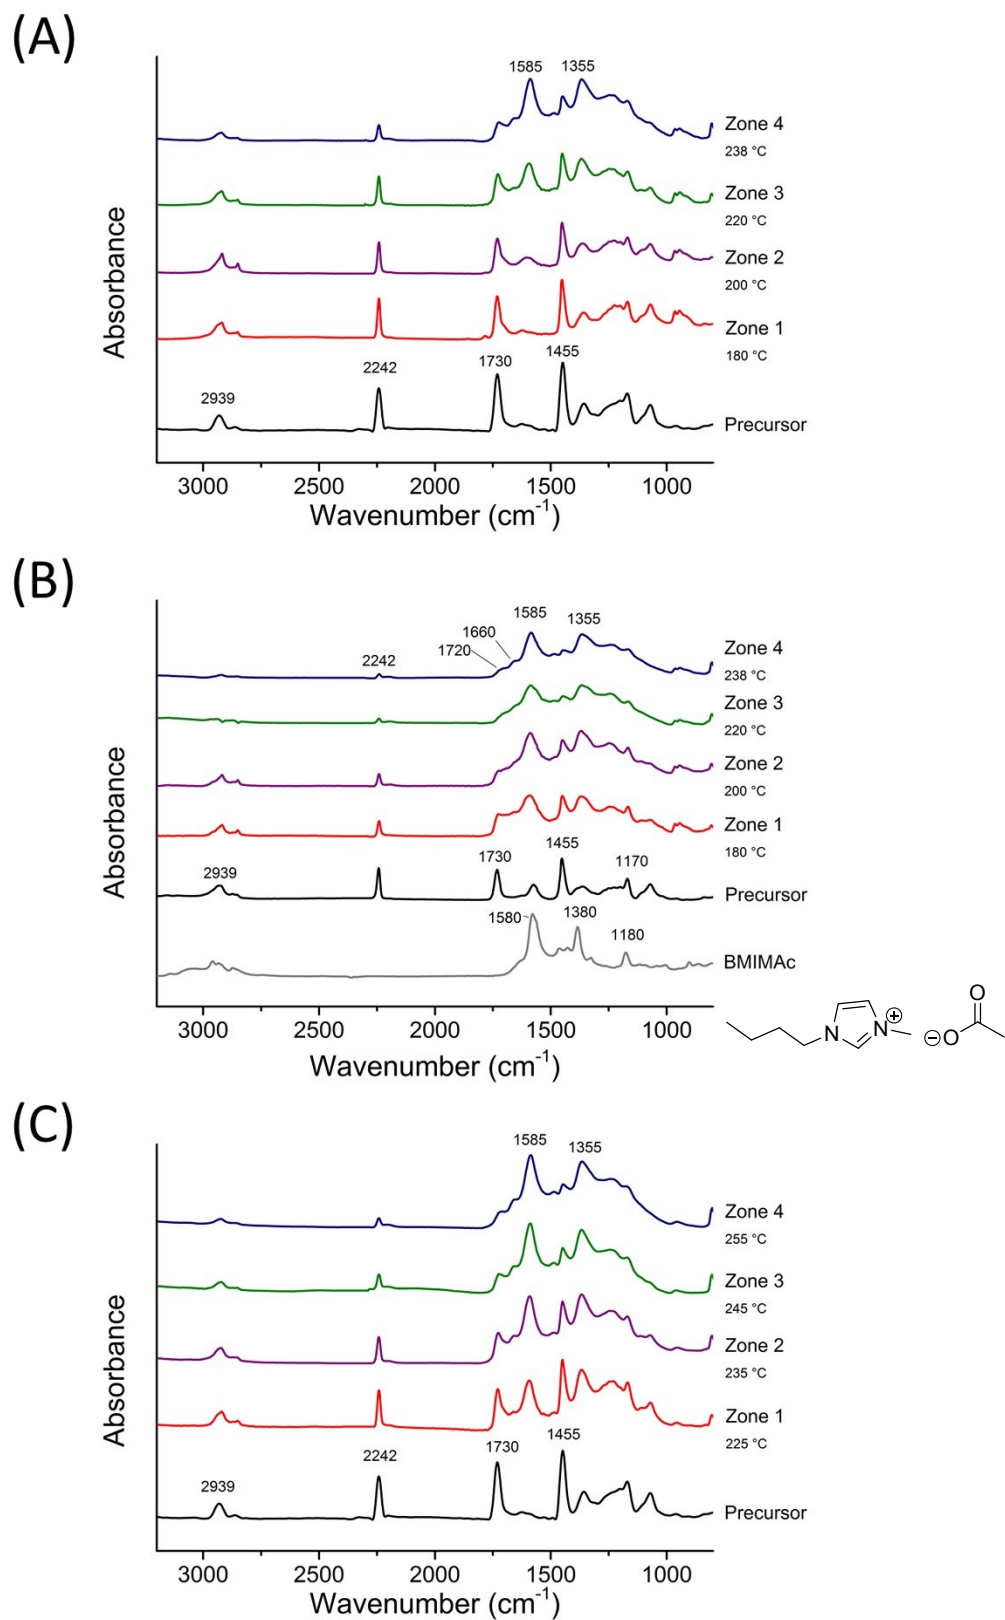

**Supplementary information related to the paragraph ‘Fibre stabilisation – Calorimetric study’**

Table 3. Recorded DSC data (mean and standard deviation) for the Control, Impregnated and Standard fibres.

| Samples     | $\Delta H$ (J/g) |             | Conversion index (%) |             |
|-------------|------------------|-------------|----------------------|-------------|
|             | <i>Mean</i>      | <i>Dev.</i> | <i>Mean</i>          | <i>Dev.</i> |
| Control     | Precursor        | 552.8 ± 5.8 | -                    |             |
|             | Zone 1           | 547.8 ± 1.1 | 0.8 ± 0.2            |             |
|             | Zone 2           | 520.0 ± 3.3 | 5.9 ± 0.6            |             |
|             | Zone 3           | 490.9 ± 2.6 | 11.1 ± 0.5           |             |
|             | Zone 4           | 425.4 ± 6.3 | 23.0 ± 1.1           |             |
| Impregnated | Precursor        | 585.1 ± 7.8 | -                    |             |
|             | Zone 1           | 439.0 ± 8.2 | 25.0 ± 1.4           |             |
|             | Zone 2           | 388.8 ± 8.9 | 33.6 ± 1.5           |             |
|             | Zone 3           | 339.7 ± 2.1 | 41.9 ± 0.4           |             |
|             | Zone 4           | 243.0 ± 6.9 | 58.5 ± 1.2           |             |
| Standard    | Precursor        | 552.8 ± 5.8 | -                    |             |
|             | Zone 1           | 427.8 ± 4.6 | 22.5 ± 0.8           |             |
|             | Zone 2           | 393.1 ± 5.4 | 28.8 ± 1.0           |             |
|             | Zone 3           | 351.1 ± 2.3 | 36.4 ± 0.4           |             |
|             | Zone 4           | 256.7 ± 4.6 | 53.5 ± 0.8           |             |

## Supplementary information related to the paragraph ‘Fibre stabilisation – thermogravimetric study’

Figure 2. TGA (top) and (bottom) DTG curves of (A) Control and (B) Standard fibres.

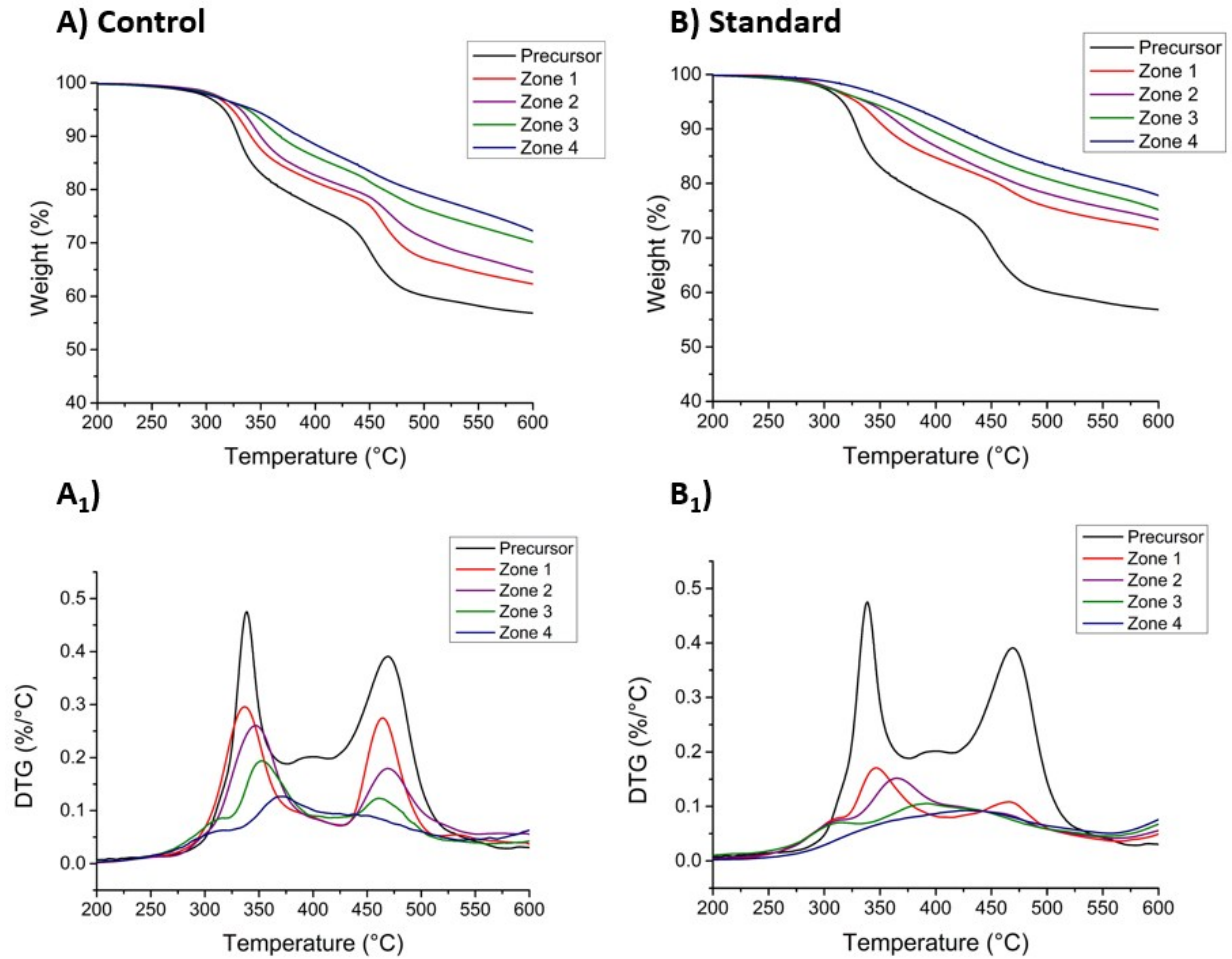

Supplement: c6ta06842a1.pdf [file c6ta06842a1.pdf]
